# Supplementary material for: Intratracheal trimerized nanobody cocktail administration suppresses weight loss and prolongs survival of SARS-CoV-2 infected mice
Source: PubMed Central journal article supplement (PMC9701191; doi:10.1038/s43856-022-00213-5), 2022-11-26
Supplement: 43856_2022_213_MOESM1_ESM.pdf [file 43856_2022_213_MOESM1_ESM.pdf]

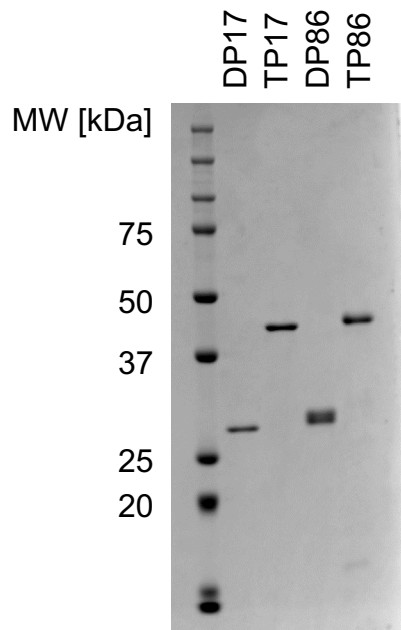

**Supplementary Figure 1** CBB staining of nanobody dimers and trimers.

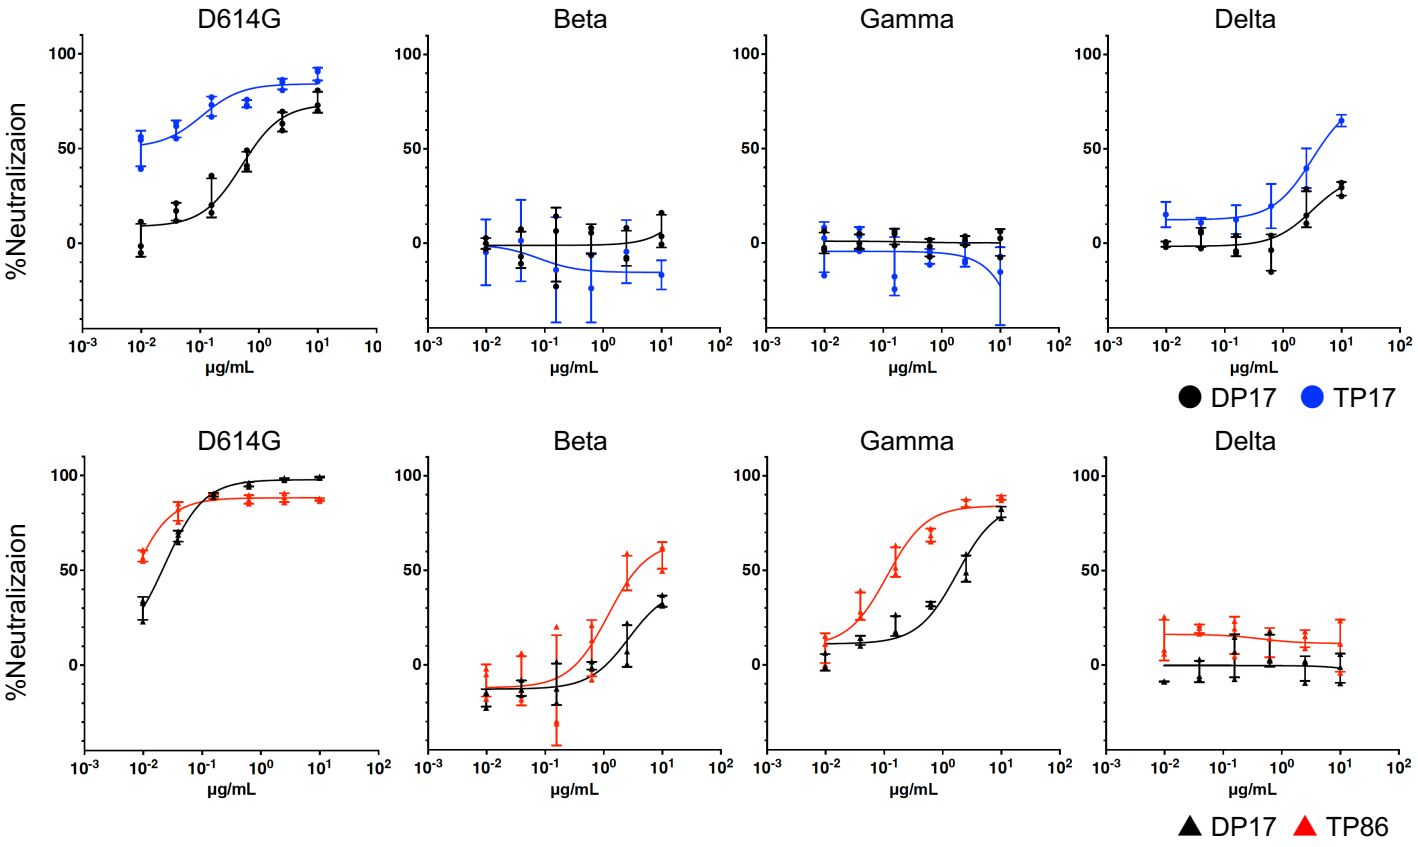

**Supplementary Figure 2** Neutralization of SARS-CoV-2 VOCs by dimerized and trimerized nanobodies.
